# Supplementary material for: Girdin-mediated interactions between cadherin and the actin cytoskeleton are required for epithelial morphogenesis in Drosophila
Source: Oxford University Press journal article supplement (doi:10.1242/dev.122002), 2015-05-12
Supplement: dev122002supp.pdf [file dev122002supp.pdf]

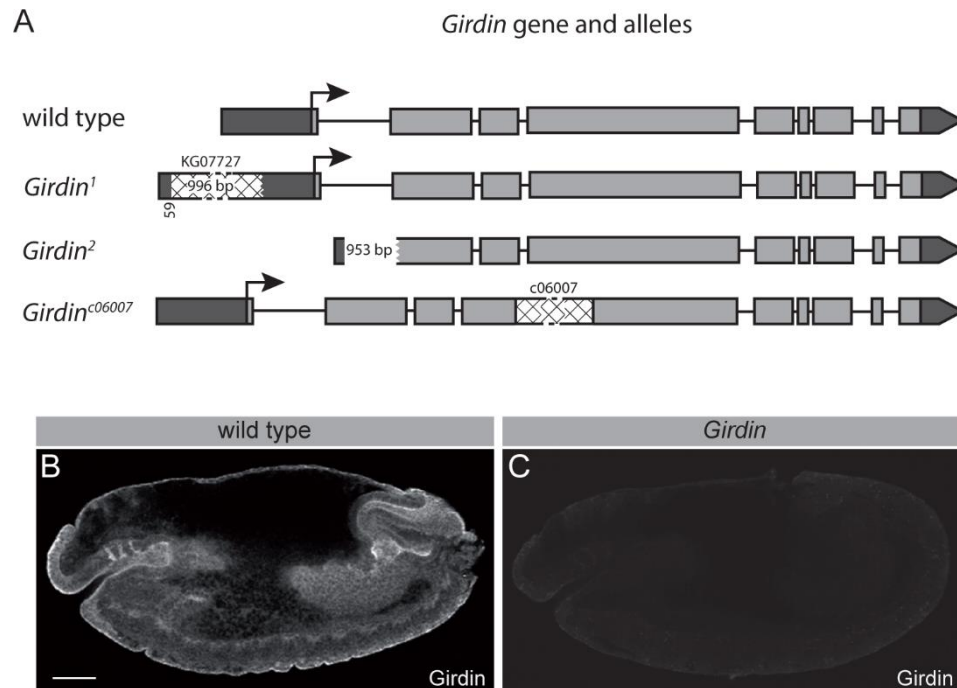

**Figure S1. Genetic and molecular tools to study Girdin functions.** A) Schematic representation of the *Girdin* gene, and of the mutant alleles used. The Girdin-PA isoform is encoded by an mRNA containing all exons of the *Girdin* gene. The allele *Girdin*<sup>2</sup> results from a 953 base pairs (bp) deletion removing 364 bp of the 5' UTR (dark grey), the start codon (arrow), the first intron and part of exon 2. The *Girdin*<sup>1</sup> allele retained 996 bp of the p-element KG07727 in the 5' UTR. *Girdin*<sup>c06007</sup> results from the insertion of PBac PB Girdin[c06007] in the fourth exon of *Girdin*. B-C) Whole embryo view of a wild type embryo (B) or a *Girdin* M/Z mutant (C) immunostained with our Girdin antibody, which is potent and specific. Scale bar in B represents 50  $\mu$ m and also applies to C.
